# Supplementary material
Source: MDPI journal article supplement (https://www.mdpi.com/2571-550X/2/3/28)
Supplement: s1 [file s1]

## Supplementary Materials

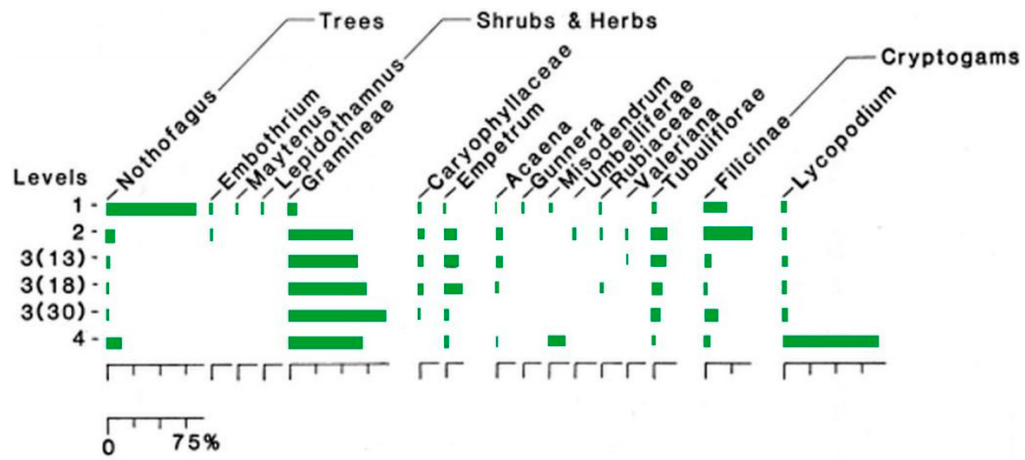

**Figure S1.** Pollen and spore diagram from the samples taken at CM. The numbers in parentheses on level three indicate depths in cm below the datum. Modified after Figure 4 of [26].

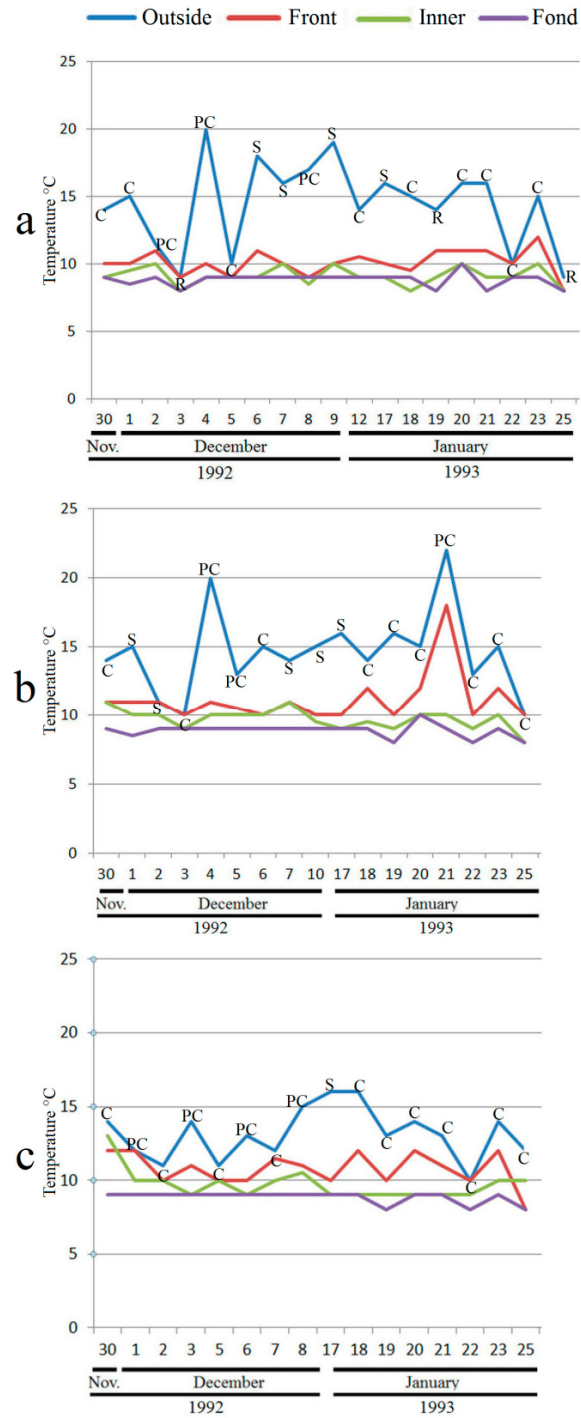

**Figure S2.** Comparative graphs of the daily temperature recorded at the CM during the morning (a), at midday (b), and during the afternoon (c). References—C: Cloudy, PC: Partly cloudy, R: Rainy, S: Sunny.
